# Supplementary material
Source: PubMed Central journal article supplement (PMC1283945)
Supplement: 7600846s1.pdf [file 7600846s1.pdf]

# Supplementary Fig. S1 (Kasper)

## a CBP wild type allele

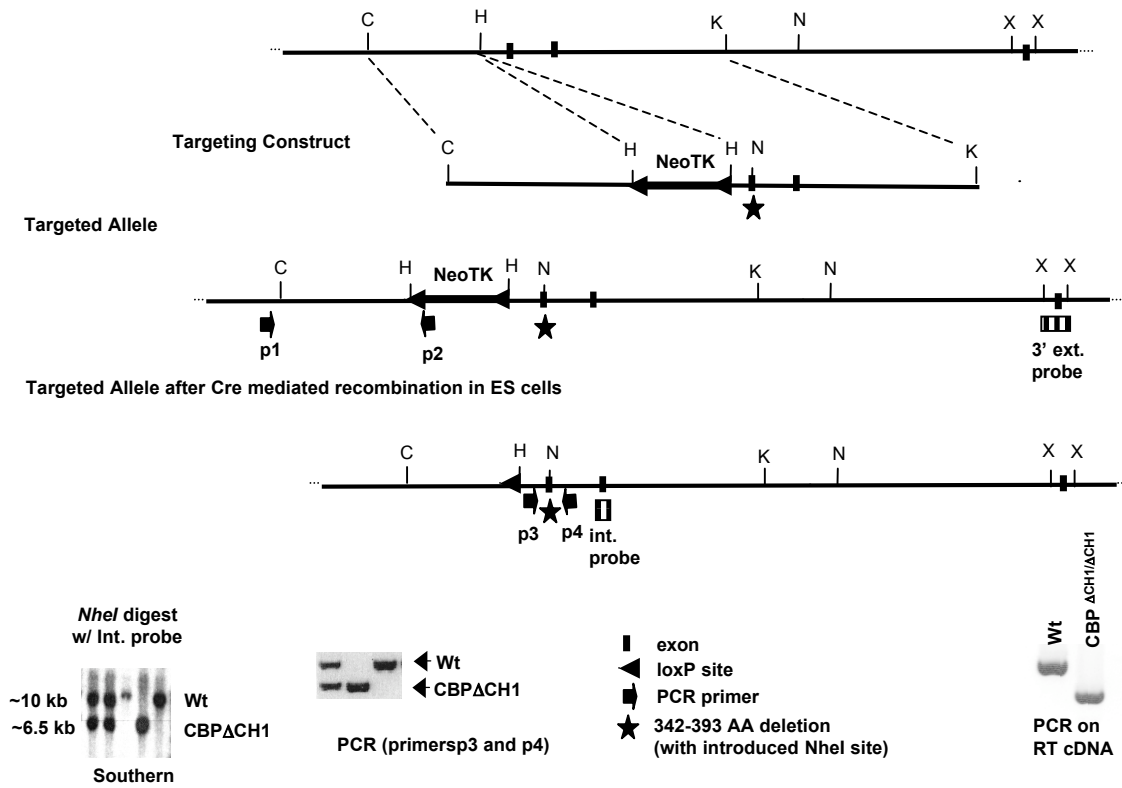

## b p300 wild type allele

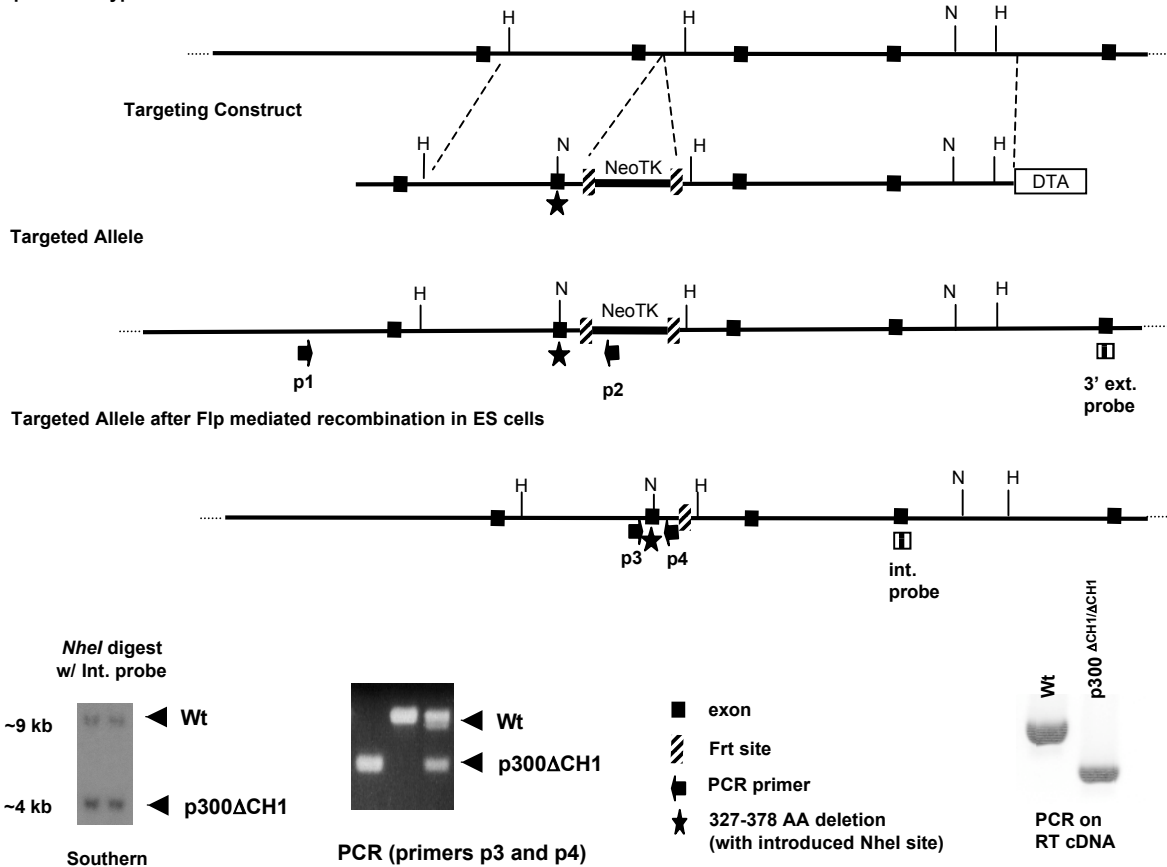

**Supplementary Fig. S1.** Deletion mutations were introduced into the CH1 domains of *CBP* (**a**) and *p300* (**b**) in ES cells by homologous recombination. The NeoTK drug selection cassette was excised in ES cells by transient expression of Cre (**a**) or Flp (**b**) recombinase. Restriction sites are indicated: C, *Cla*I; H, *Hind*III; K, *Kpn*I; N, *Nhe*I; X, *Xba*I. Homologous targeting confirmed by Southern blot (*Eco*RV digest for *CBP*, *Eco*RI digest for *p300*) using external probes (indicated) and PCR (primers p1 and p2). Screening after NeoTK cassette excision by PCR (primers p3 and p4) and Southern blot using *Nhe*I digest and internal probes (indicated). A diphtheria toxin gene (DTA) was included in the p300 construct. Correct splicing of the RNA was determined by PCR using primers in exons 3 and 5 of *CBP* or *p300* and RTcDNA from *CBP*<sup>ΔCH1/ΔCH1</sup> (**a**) or *p300*<sup>ΔCH1/ΔCH1</sup> (**b**) MEFs and confirmed by sequencing the products. PCR on RTcDNA using primers in exons 2 and 12 for *CBP* and exons 3 and 13 for *p300* also gave single products of the correct size in MEFs homozygous for the ΔCH1 mutant alleles (data not shown).
