# Supplementary material
Source: PubMed Central journal article supplement (PMC1283945)
Supplement: 7600846s4.pdf [file 7600846s4.pdf]

# Supplementary Fig. S4 (Kasper)

**a**

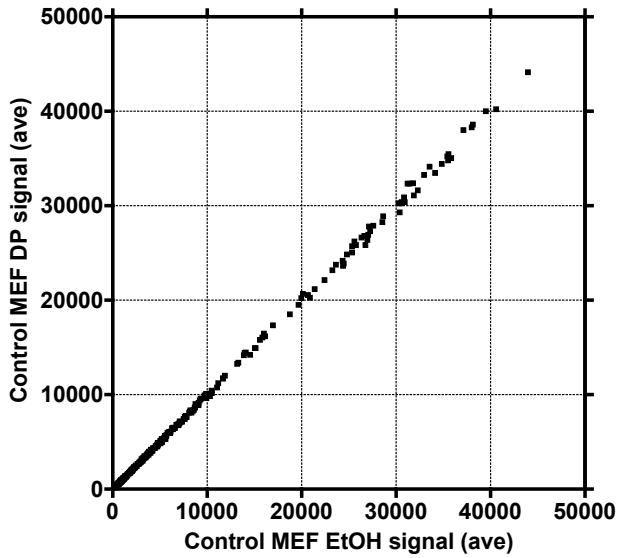

**b**

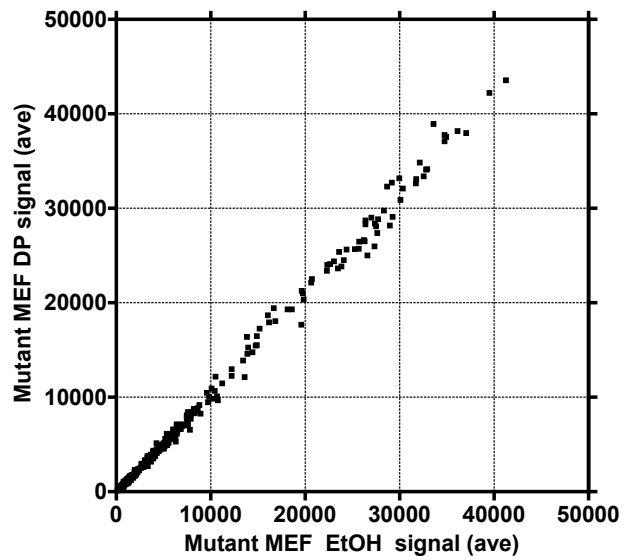

**c**

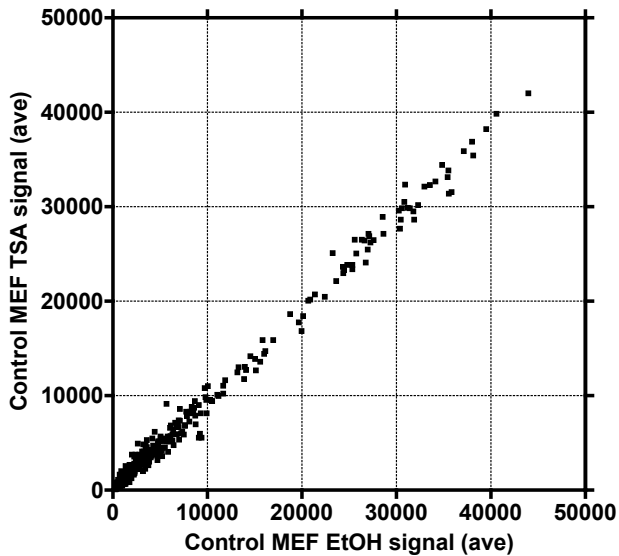

**d**

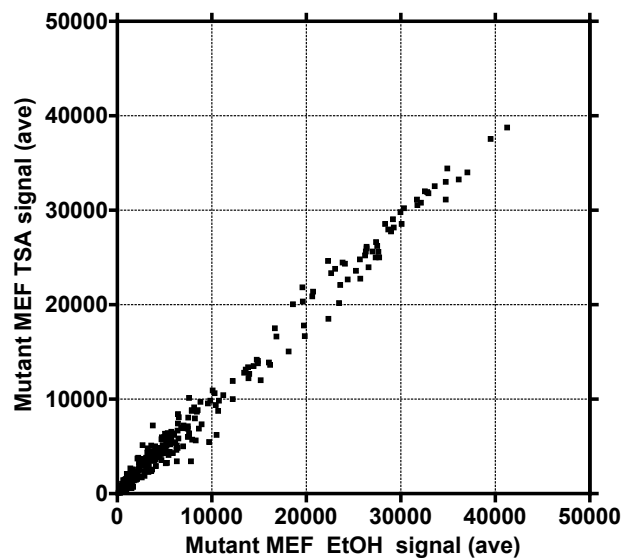

**e**

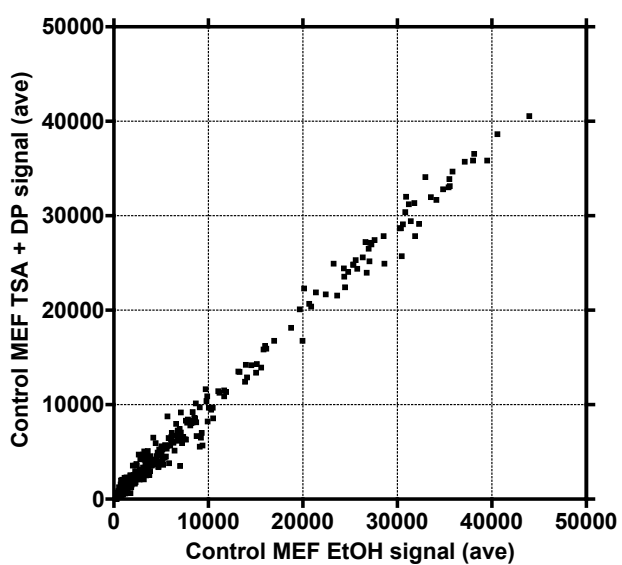

**f**

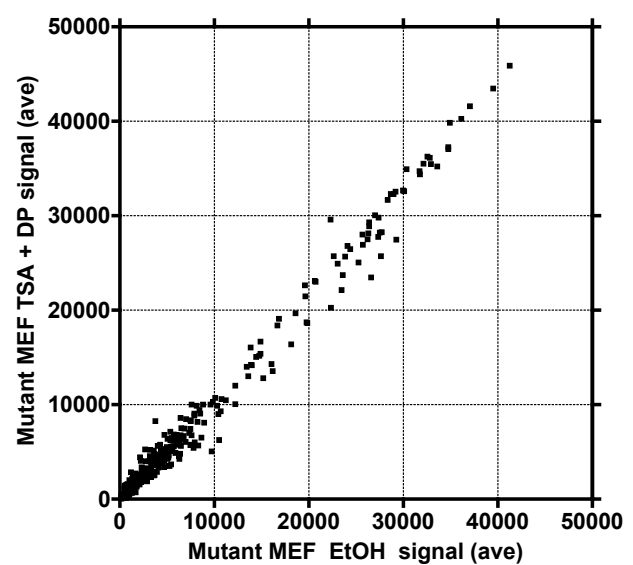

**Supplementary Fig. S4.** TSA does not grossly alter global expression of non-HIF responsive genes in  $\Delta$ flox or tri- $\Delta$ CH1/ $\Delta$ flox MEFs. **a-f**, MEFs were treated with TSA or ethanol vehicle then with DP or ethanol vehicle for 3 hours. 384 selected Affymetrix 430 ver. 2.0 probesets defined as being present and less than 5% different between EtOH and DP treatments in both  $\Delta$ flox MEFs (**a**) were used to compare gene expression with EtOH treatment to DP (**a,b**), TSA (**c,d**) and TSA+DP (**e,f**) treatment in  $\Delta$ flox (**a,c,e**) and tri- $\Delta$ CH1/ $\Delta$ flox (**b,d,f**) MEFs. Signals averaged for the two types of  $\Delta$ flox (control) and two types of tri- $\Delta$ CH1/ $\Delta$ flox (mutant) MEFs (N=2). Note minimal data scatter and slopes close to one.
