# Supplementary material
Source: PubMed Central journal article supplement (PMC1283945)
Supplement: 7600846s5.pdf [file 7600846s5.pdf]

**Supplementary Table S1 (Kasper).** Thirty-seven mammalian proteins that interact with the CH1 domain regions of CBP or p300 *in vitro*. Official gene symbol and the general phenotype of mice with knockouts of the gene were from Mouse Genome Informatics (<http://www.informatics.jax.org/>). Not applicable (NA). Some interactions may not require the CH1 zinc-containing structure (Matt et al., 2004).

| Cellular factor       | Reference                    | Mouse gene symbol    | KO phenotype             |
|-----------------------|------------------------------|----------------------|--------------------------|
| AIRE                  | (Pitkanen et al., 2000)      | <i>Aire</i>          | immune defects           |
| $\beta$ -catenin      | (Sun et al., 2000)           | <i>Catnb</i>         | embryonic lethal         |
| C/ATF                 | (Yukawa et al., 1999)        | <i>Atf4</i>          | eye & blood defects      |
| Cdx-2                 | (Hussain and Habener, 1999)  | <i>Cdx2</i>          | embryonic lethal         |
| CITED4                | (Braganca et al., 2002)      | <i>Cited4</i>        | NA                       |
| E2F-1                 | (Chan and La Thangue, 2001)  | <i>E2f1</i>          | variety of defects       |
| EID-1                 | (Miyake et al., 2000)        | <i>Cri2</i>          | NA                       |
| Ets-1                 | (Goodman and Smolik, 2000)   | <i>Ets1</i>          | T- & B-cell defects      |
| Ets-2                 | (Jayaraman et al., 1999)     | <i>Ets2</i>          | embryonic lethal         |
| Foxo4                 | (Fukuoka et al., 2003)       | <i>Mllt7</i>         | grossly normal           |
| hHR23a                | (Zhu et al., 2001)           | <i>Rad23a</i>        | grossly normal           |
| HIF-1 $\alpha$        | (Goodman and Smolik, 2000)   | <i>Hif1a</i>         | embryonic lethal         |
| HIF-2 $\alpha$        | (Gradin et al., 2002)        | <i>Epas1</i>         | variety of defects       |
| HNF-1 $\alpha$        | (Eeckhoutte et al., 2004)    | <i>Tcf1</i>          | lethal/metabolic defects |
| HNF-4                 | (Goodman and Smolik, 2000)   | <i>Hnf4a</i>         | embryonic lethal         |
| IRF-3                 | (Yang et al., 2002)          | <i>Irf3</i>          | NA                       |
| IRF-7                 | (Yang et al., 2003)          | <i>Irf7</i>          | NA                       |
| Mdm2                  | (Goodman and Smolik, 2000)   | <i>Mdm2</i>          | embryonic lethal         |
| MSG1                  | (Yahata et al., 2000)        | <i>Cited1</i>        | variable lethality       |
| Nrf2                  | (Kato et al., 2001)          | <i>Nfe2l2</i>        | metabolic defects        |
| p35srj                | (Bhattacharya et al., 1999)  | <i>Cited2</i>        | embryonic lethal         |
| p53                   | (Chan and La Thangue, 2001)  | <i>Trp53</i>         | tumor prone              |
| p65                   | (Goodman and Smolik, 2000)   | <i>Rela</i>          | embryonic lethal         |
| p73                   | (Goodman and Smolik, 2000)   | <i>Trp73</i>         | variety of defects       |
| Pax-6                 | (Hussain and Habener, 1999)  | <i>Pax6</i>          | variety of defects       |
| PIMT                  | (Misra et al., 2002)         | <i>Ncoa6ip</i>       | NA                       |
| Pit-1                 | (Goodman and Smolik, 2000)   | <i>Pit1</i>          | pituitary defects        |
| Prothymosin- $\alpha$ | (Subramanian et al., 2002)   | <i>Ptma</i>          | NA                       |
| RXR                   | (Goodman and Smolik, 2000)   | <i>Rxra</i>          | embryonic lethal         |
| Smad4                 | (de Caestecker et al., 2000) | <i>Smad4</i>         | embryonic lethal         |
| SNIP1                 | (Kim et al., 2001)           | <i>Snip1</i>         | NA                       |
| SRCAP                 | (Monroy et al., 2001)        | <i>D030022P06Rik</i> | NA                       |
| SREBP-1a              | (Toth et al., 2004)          | <i>Sreb1</i>         | metabolic defects        |
| STAT2                 | (Goodman and Smolik, 2000)   | <i>Stat2</i>         | immune defects           |
| SYT                   | (Chan and La Thangue, 2001)  | <i>Ss18</i>          | NA                       |
| Tal1                  | (Goodman and Smolik, 2000)   | <i>Tal1</i>          | embryonic lethal         |
| TBP                   | (Goodman and Smolik, 2000)   | <i>Tbp</i>           | embryonic lethal         |

**References for Supplementary Table S1**

- Bhattacharya, S., Michels, C.L., Leung, M.K., Arany, Z.P., Kung, A.L. and Livingston, D.M. (1999) Functional role of p35srj, a novel p300/CBP binding protein, during transactivation by HIF-1. *Genes Dev*, **13**, 64-75.
- Braganca, J., Swingler, T., Marques, F.I., Jones, T., Eloranta, J.J., Hurst, H.C., Shioda, T. and Bhattacharya, S. (2002) Human CREB-binding protein/p300-interacting transactivator with ED-rich tail (CITED) 4, a new member of the CITED family, functions as a co-activator for transcription factor AP-2. *J Biol Chem*, **277**, 8559-8565.
- Chan, H.M. and La Thangue, N.B. (2001) p300/CBP proteins: HATs for transcriptional bridges and scaffolds. *J Cell Sci*, **114**, 2363-2373.
- de Caestecker, M.P., Yahata, T., Wang, D., Parks, W.T., Huang, S., Hill, C.S., Shioda, T., Roberts, A.B. and Lechleider, R.J. (2000) The Smad4 activation domain (SAD) is a proline-rich, p300-dependent transcriptional activation domain. *J Biol Chem*, **275**, 2115-2122.
- Eeckhoute, J., Formstecher, P. and Laine, B. (2004) Hepatocyte nuclear factor 4alpha enhances the hepatocyte nuclear factor 1alpha-mediated activation of transcription. *Nucleic Acids Res*, **32**, 2586-2593.
- Fukuoka, M., Daitoku, H., Hatta, M., Matsuzaki, H., Umemura, S. and Fukamizu, A. (2003) Negative regulation of forkhead transcription factor AFX (Foxo4) by CBP-induced acetylation. *Int J Mol Med*, **12**, 503-508.
- Goodman, R.H. and Smolik, S. (2000) CBP/p300 in cell growth, transformation, and development. *Genes Dev*, **14**, 1553-1577.
- Gradin, K., Takasaki, C., Fujii-Kuriyama, Y. and Sogawa, K. (2002) The transcriptional activation function of the HIF-like factor requires phosphorylation at a conserved threonine. *J Biol Chem*, **277**, 23508-23514.
- Hussain, M.A. and Habener, J.F. (1999) Glucagon gene transcription activation mediated by synergistic interactions of pax-6 and cdx-2 with the p300 co-activator. *J Biol Chem*, **274**, 28950-28957.
- Jayaraman, G., Srinivas, R., Duggan, C., Ferreira, E., Swaminathan, S., Somasundaram, K., Williams, J., Hauser, C., Kurkinen, M., Dhar, R., Weitzman, S., Buttice, G. and Thimmapaya, B. (1999) p300/cAMP-responsive element-binding protein interactions with ets-1 and ets-2 in the transcriptional activation of the human stromelysin promoter. *J Biol Chem*, **274**, 17342-17352.
- Katoh, Y., Itoh, K., Yoshida, E., Miyagishi, M., Fukamizu, A. and Yamamoto, M. (2001) Two domains of Nrf2 cooperatively bind CBP, a CREB binding protein, and synergistically activate transcription. *Genes Cells*, **6**, 857-868.
- Kim, R.H., Flanders, K.C., Birkey Reffey, S., Anderson, L.A., Duckett, C.S., Perkins, N.D. and Roberts, A.B. (2001) SNIP1 inhibits NF-kappa B signaling by competing for its binding to the C/H1 domain of CBP/p300 transcriptional co-activators. *J Biol Chem*, **276**, 46297-46304.
- Matt, T., Martinez-Yamout, M.A., Dyson, H.J. and Wright, P.E. (2004) The CBP/p300 TAZ1 domain in its native state is not a binding partner of MDM2. *Biochem J*, **381**, 685-691.

- Misra, P., Qi, C., Yu, S., Shah, S.H., Cao, W.Q., Rao, M.S., Thimmapaya, B., Zhu, Y. and Reddy, J.K. (2002) Interaction of PIMT with transcriptional coactivators CBP, p300, and PBP differential role in transcriptional regulation. *J Biol Chem*, **277**, 20011-20019.
- Miyake, S., Sellers, W.R., Safran, M., Li, X., Zhao, W., Grossman, S.R., Gan, J., DeCaprio, J.A., Adams, P.D. and Kaelin, W.G., Jr. (2000) Cells degrade a novel inhibitor of differentiation with E1A-like properties upon exiting the cell cycle. *Mol Cell Biol*, **20**, 8889-8902.
- Monroy, M.A., Ruhl, D.D., Xu, X., Granner, D.K., Yaciuk, P. and Chrivia, J.C. (2001) Regulation of cAMP-responsive element-binding protein-mediated transcription by the SNF2/SWI-related protein, SRCAP. *J Biol Chem*, **276**, 40721-40726.
- Pitkanen, J., Doucas, V., Sternsdorf, T., Nakajima, T., Aratani, S., Jensen, K., Will, H., Vahamurto, P., Ollila, J., Vihinen, M., Scott, H.S., Antonarakis, S.E., Kudoh, J., Shimizu, N., Krohn, K. and Peterson, P. (2000) The autoimmune regulator protein has transcriptional transactivating properties and interacts with the common coactivator CREB-binding protein. *J Biol Chem*, **275**, 16802-16809.
- Subramanian, C., Hasan, S., Rowe, M., Hottiger, M., Orre, R. and Robertson, E.S. (2002) Epstein-Barr virus nuclear antigen 3C and prothymosin alpha interact with the p300 transcriptional coactivator at the CH1 and CH3/HAT domains and cooperate in regulation of transcription and histone acetylation. *J Virol*, **76**, 4699-4708.
- Sun, Y., Kolligs, F.T., Hottiger, M.O., Mosavin, R., Fearon, E.R. and Nabel, G.J. (2000) Regulation of beta -catenin transformation by the p300 transcriptional coactivator. *Proc Natl Acad Sci U S A*, **97**, 12613-12618.
- Toth, J.I., Datta, S., Athanikar, J.N., Freedman, L.P. and Osborne, T.F. (2004) Selective coactivator interactions in gene activation by SREBP-1a and -1c. *Mol Cell Biol*, **24**, 8288-8300.
- Yahata, T., de Caestecker, M.P., Lechleider, R.J., Andriole, S., Roberts, A.B., Isselbacher, K.J. and Shioda, T. (2000) The MSG1 non-DNA-binding transactivator binds to the p300/CBP coactivators, enhancing their functional link to the Smad transcription factors. *J Biol Chem*, **275**, 8825-8834.
- Yang, H., Lin, C.H., Ma, G., Baffi, M.O. and Wathelet, M.G. (2003) Interferon regulatory factor-7 synergizes with other transcription factors through multiple interactions with p300/CBP coactivators. *J Biol Chem*, **278**, 15495-15504.
- Yang, H., Lin, C.H., Ma, G., Orr, M., Baffi, M.O. and Wathelet, M.G. (2002) Transcriptional activity of interferon regulatory factor (IRF)-3 depends on multiple protein-protein interactions. *Eur J Biochem*, **269**, 6142-6151.
- Yukawa, K., Tanaka, T., Tsuji, S. and Akira, S. (1999) Regulation of transcription factor C/ATF by the cAMP signal activation in hippocampal neurons, and molecular interaction of C/ATF with signal integrator CBP/p300. *Brain Res Mol Brain Res*, **69**, 124-134.
- Zhu, Q., Wani, G., Wani, M.A. and Wani, A.A. (2001) Human homologue of yeast Rad23 protein A interacts with p300/cyclic AMP-responsive element binding (CREB)-binding protein to down-regulate transcriptional activity of p53. *Cancer Res*, **61**, 64-70.
