# Supplementary material
Source: PubMed Central journal article supplement (PMC1283945)
Supplement: 7600846s6.pdf [file 7600846s6.pdf]

**Supplementary Table S2 (Kasper).** Comparison of 71 Affymetrix array 430 2.0 probesets representing 40 HIF-1 $\alpha$  target genes as defined by Manalo *et al.* (Manalo *et al.*, 2005) and Greijer *et al.* (Greijer *et al.*, 2005). Three lines of  $\Delta$ flox control (one of type #1, two of #2) and tri- $\Delta$ CH1/ $\Delta$ flox mutant MEFs (one of type #1, two of #2) were exposed to 6 h of normoxia or hypoxia (0.1% O<sub>2</sub>). Inclusion of HIF-1 $\alpha$  target gene probe sets required induction by hypoxia of  $\geq 1.5$ -fold and probe sets scored as present in all hypoxia treated control MEF lines. Presented as ratio of hypoxia-dependent expression signal (subtracting out the normoxia expression signal) in tri- $\Delta$ CH1/ $\Delta$ flox MEFs to  $\Delta$ flox MEFs ( $\Delta$ CH1). Data for multiple probe sets representing a single gene were averaged for the grand mean.

| Probe Set ID | Gene Symbol    | Gene Title                                                 | $\Delta$ CH1 |
|--------------|----------------|------------------------------------------------------------|--------------|
| 1437868_at   | BC023892       | ---                                                        | 0.22         |
| 1445626_at   | Lgals3         | Lectin, galactose binding, soluble 3                       | 1.46         |
| 1451385_at   | 2310056P07Rik  | RIKEN cDNA 2310056P07 gene                                 | 0.64         |
| 1425344_at   | 4430402O11Rik  | RIKEN cDNA 4430402O11 gene                                 | 0.21         |
| 1451678_at   | 4430402O11Rik  | RIKEN cDNA 4430402O11 gene                                 | 0.17         |
| 1416077_at   | Adm            | adrenomedullin                                             | 0.11         |
| 1447839_x_at | Adm            | adrenomedullin                                             | 0.17         |
| 1418025_at   | Bhlhb2         | basic helix-loop-helix domain containing, class B2         | 0.65         |
| 1422470_at   | Bnip3          | BCL2/adenovirus E1B 19kDa-interacting protein 1, NIP3      | 0.82         |
| 1416922_a_at | Bnip3l         | BCL2/adenovirus E1B 19kDa-interacting protein 3-like       | 0.91         |
| 1416923_a_at | Bnip3l         | BCL2/adenovirus E1B 19kDa-interacting protein 3-like       | 0.99         |
| 1448525_a_at | Bnip3l         | BCL2/adenovirus E1B 19kDa-interacting protein 3-like       | 1.01         |
| 1416488_at   | Ccng2          | cyclin G2                                                  | 0.54         |
| 1448364_at   | Ccng2          | cyclin G2                                                  | 0.49         |
| 1417625_s_at | Cmkor1         | chemokine orphan receptor 1                                | 0.04         |
| 1428306_at   | Ddit4          | DNA-damage-inducible transcript 4                          | 0.45         |
| 1423785_at   | Egln1          | EGL nine homolog 1 (C. elegans)                            | 0.95         |
| 1451110_at   | Egln1          | EGL nine homolog 1 (C. elegans)                            | 0.85         |
| 1418648_at   | Egln3          | EGL nine homolog 3 (C. elegans)                            | 0.28         |
| 1418649_at   | Egln3          | EGL nine homolog 3 (C. elegans)                            | 0.18         |
| 1419029_at   | Ero1l          | ERO1-like (S. cerevisiae)                                  | 0.39         |
| 1419030_at   | Ero1l          | ERO1-like (S. cerevisiae)                                  | 0.45         |
| 1449324_at   | Ero1l          | ERO1-like (S. cerevisiae)                                  | 0.50         |
| 1420654_a_at | Gbe1           | glucan (1,4-alpha-), branching enzyme 1                    | 1.02         |
| 1420997_a_at | Gpi1           | glucose phosphate isomerase 1                              | 0.54         |
| 1450081_x_at | Gpi1           | glucose phosphate isomerase 1                              | 0.52         |
| 1456909_at   | Gpi1           | glucose phosphate isomerase 1                              | 1.38         |
| 1417772_at   | Grhpr          | glyoxylate reductase/hydroxypyruvate reductase             | 1.34         |
| 1450196_s_at | Gys1 /// Gys3  | glycogen synthase 1, muscle /// glycogen synthase 3, brain | 0.80         |
| 1416480_a_at | Hig1           | hypoxia induced gene 1                                     | 0.88         |
| 1416481_s_at | Hig1           | hypoxia induced gene 1                                     | 0.76         |
| 1448359_a_at | Hig1           | hypoxia induced gene 1                                     | 0.71         |
| 1422612_at   | Hk2            | hexokinase 2                                               | 0.61         |
| 1419647_a_at | Ier3           | immediate early response 3                                 | 0.36         |
| 1426810_at   | Jmjd1a         | Jumonji domain containing 1A                               | 0.67         |
| 1417156_at   | Krt1-19        | keratin complex 1, acidic, gene 19                         | 0.33         |
| 1418936_at   | Maff           | v-maf, protein F (avian)                                   | 0.52         |
| 1425732_a_at | Mxi1           | Max interacting protein 1                                  | 0.57         |
| 1450376_at   | Mxi1           | Max interacting protein 1                                  | 0.55         |
| 1423413_at   | Ndrg1          | N-myc downstream regulated gene 1                          | 0.37         |
| 1450976_at   | Ndrg1          | N-myc downstream regulated gene 1                          | 0.41         |
| 1456174_x_at | Ndrg1          | N-myc downstream regulated gene 1                          | 0.43         |
| 1420760_s_at | Ndr1           | N-myc downstream regulated-like                            | 0.41         |
| 1450977_s_at | Ndr1 /// Ndrg1 | N-myc downstream regulated-like                            | 0.44         |
| 1417149_at   | P4ha2          | proline 4-hydroxylase, alpha II polypeptide                | 0.42         |
| 1439148_a_at | Pfkf           | phosphofructokinase, liver, B-type                         | 0.93         |

|                                                                                                      |         |                                                              |                      |
|------------------------------------------------------------------------------------------------------|---------|--------------------------------------------------------------|----------------------|
| 1450269_a_at                                                                                         | Pfkl    | phosphofructokinase, liver, B-type                           | 1.02                 |
| 1416069_at                                                                                           | Pfkp    | phosphofructokinase, platelet                                | 0.65                 |
| 1430634_a_at                                                                                         | Pfkp    | phosphofructokinase, platelet                                | 0.80                 |
| 1418471_at                                                                                           | Pgf     | placental growth factor                                      | 0.04                 |
| 1439435_x_at                                                                                         | Pgk1    | phosphoglycerate kinase 1                                    | 0.74                 |
| 1420715_a_at                                                                                         | Pparg   | peroxisome proliferator activated receptor gamma             | 1.40                 |
| 1429206_at                                                                                           | Rhobtb1 | Rho-related BTB domain containing 1                          | 0.76                 |
| 1429656_at                                                                                           | Rhobtb1 | Rho-related BTB domain containing 1                          | 0.75                 |
| 1421924_at                                                                                           | Slc2a3  | solute carrier family 2 (facilitated glucose transporter), 3 | 0.42                 |
| 1437052_s_at                                                                                         | Slc2a3  | solute carrier family 2 (facilitated glucose transporter), 3 | 0.32                 |
| 1455898_x_at                                                                                         | Slc2a3  | solute carrier family 2 (facilitated glucose transporter), 3 | 0.36                 |
| 1450448_at                                                                                           | Stc1    | stanniocalcin 1                                              | 0.35                 |
| 1419503_at                                                                                           | Stc2    | stanniocalcin 2                                              | 0.52                 |
| 1445186_at                                                                                           | Stc2    | stanniocalcin 2                                              | 0.43                 |
| 1449484_at                                                                                           | Stc2    | stanniocalcin 2                                              | 0.52                 |
| 1415918_a_at                                                                                         | Tpi1    | triosephosphate isomerase 1                                  | 0.94                 |
| 1435659_a_at                                                                                         | Tpi1    | triosephosphate isomerase 1                                  | 0.88                 |
| 1452927_x_at                                                                                         | Tpi1    | triosephosphate isomerase 1                                  | 0.95                 |
| 1420909_at                                                                                           | Vegfa   | vascular endothelial growth factor A                         | 0.39                 |
| 1451959_a_at                                                                                         | Vegfa   | vascular endothelial growth factor A                         | 0.32                 |
| 1417900_a_at                                                                                         | Vldlr   | very low density lipoprotein receptor                        | 1.02                 |
| 1434465_x_at                                                                                         | Vldlr   | very low density lipoprotein receptor                        | 1.05                 |
| 1435893_at                                                                                           | Vldlr   | very low density lipoprotein receptor                        | 1.21                 |
| 1438258_at                                                                                           | Vldlr   | very low density lipoprotein receptor                        | 0.99                 |
| 1442169_at                                                                                           | Vldlr   | very low density lipoprotein receptor                        | 1.48                 |
| <b>ratio of mutant hypoxia-induced signal to control hypoxia-induced signal, grand mean +/- S.D.</b> |         |                                                              | <b>0.65 +/- 0.47</b> |
